# Supplementary material for: In-cage and out-of-cage combinations of benzylic radical pairs in the glassy and melted states of poly(alkyl methacrylate)s
Source: Royal Society of Chemistry journal article supplement (doi:10.1039/c1pp05282a), 2012-03-19
Supplement: c1pp05282a.pdf [file c1pp05282a.pdf]

### *Supporting Information*

#### **In-cage and out-of-cage combinations of benzylic radical pairs in the glassy and melted states of poly(alkyl methacrylate)s**

Shibu Abraham,<sup>a</sup> Indrajit Ghosh,<sup>b</sup> Werner M. Nau,<sup>b</sup> Carlos Chesta,<sup>c</sup> Steven J. Pas,<sup>d,e</sup> Anita J. Hill,<sup>d,e</sup> and Richard G. Weiss<sup>a,\*</sup>

<sup>a</sup>Department of Chemistry, Georgetown University, Washington DC 20057-1227, <sup>b</sup>School of Engineering and Science, Jacobs University Bremen, Campus Ring 1, D-28759 Bremen, Germany, <sup>c</sup>Departamento de Química, Universidad Nacional de Río Cuarto, 5800-Río Cuarto, Argentina, <sup>d</sup>CSIRO Materials Science and Engineering, Private Bag 33, South Clayton, VIC 3168, Australia, <sup>e</sup>Monash University Department of Materials Engineering, Wellington Road, Clayton, VIC 3800, Australia.

E-mail:weissr@georgetown.edu

#### **1.1. Materials**

Cyclohexane (Fischer, 99.9%), hexane (Fischer, HPLC grade), toluene (EMD, 99.5%), ditolylmethane (Pfaltz and Bauer, 95%), and methanol (Fisher, HPLC grade) were used as received. Approximate molecular weights of poly(alkyl methacrylate)s (PAMAs) from information by suppliers (mentioned in main text) are: PEMA-350,000, PCHMA-65,000, PIBMA-70,000, PBMA-180,000, and PHDMA-200,000.

#### **1.2. General procedures for purification of PAMAs**

A 10 g aliquot of PBMA, PCHMA or PIBMA was dissolved in 45 mL of warm cyclohexane. After cooling, the solution was poured into 200 mL of stirred methanol. The precipitate was separated by decanting the solution and the white solid was washed with 50 mL of methanol. This procedure was repeated two more times. The precipitate was left under dynamic vacuum (250 mm of Hg) at 333 K for 6 h to remove residual solvent. A 10 g aliquot of PEMA was warmed in 40 mL CH<sub>2</sub>Cl<sub>2</sub> until it dissolved. At room temperature, 100 mL of hexane were added and a white precipitate was obtained. The precipitate was washed with 50 mL hexane and separated by decanting the liquid. This procedure was repeated two more times. The solid was dried as described above. A 7.6 g portion of a solution of 30 % PHDMA in toluene was poured into 20 mL of hexane. This mixture was concentrated by evaporation under nitrogen. The polymer was dissolved in 20 mL toluene and precipitated by adding 200 mL methanol. The liquid was decanted from the white solid. This process was repeated twice more and the PHDMA was dried as described above.

### 1. 3. Analyses

#### 1. 3. 1. Instrument response factors

The photoproducts found after irradiation of 1-(4-methylphenyl)-3-phenyl-2-propanone [ACOB<sub>1</sub>] AA, AB<sub>1</sub> and B<sub>1</sub>B<sub>1</sub>, are shown in Scheme S1.

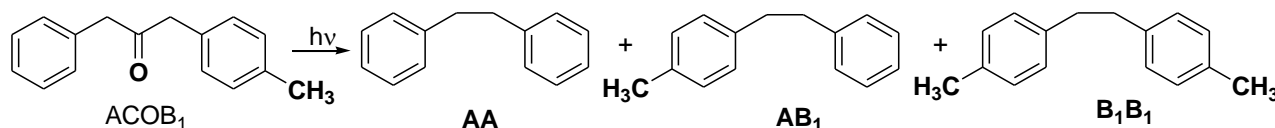

*Scheme S1.*

The ratios of [AA]:[AB<sub>1</sub>]:[B<sub>1</sub>B<sub>1</sub>] photoproduct areas under the GC peaks in chromatograms were measured after different periods of irradiation (and % conversions) of ACOB<sub>1</sub> in low viscosity liquid solvents. Assuming that the true ratios are 1:2:1, appropriate multiplication factors for each peak were determined. These instrumental response factors were then used to convert relative peak areas for products from irradiations of ACOB<sub>1</sub> in polymer films into product ratios.

The percentage conversions were calculated using eq S1 after converting the peak areas into relative molar concentrations with the response factors.

$$\text{percent conversion} = 100 \times \frac{[AA] + [AB_1] + [B_1B_1]}{[AB_1] + [AA] + [B_1B_1] + [ACOB_1]} \quad (\text{S1})$$

The instrumental responses obtained for photoproducts on irradiation of a solution of ACOB<sub>1</sub> in the presence of an internal standard were used to determine the correction factor for the starting material, ACOB<sub>1</sub>. In this experiment dodecane was used as the internal standard and the percentage conversions were determined using eq S2:

$$\text{percent conversion} = \frac{\left\{ \frac{(A_{ACOB_1})_{t=0}}{(A_{\text{dodecane}})} \right\} - \left\{ \frac{(A_{ACOB_1})_{t=t}}{(A_{\text{dodecane}})} \right\} \times 100}{\left\{ \frac{(A_{ACOB_1})_{t=0}}{(A_{\text{dodecane}})} \right\}} \quad (\text{S2})$$

where  $(A_{ACOB_1})_{t=t}$  is the peak area of [ACOB<sub>1</sub>] at any irradiation time  $t$ ,  $(A_{ACOB_1})_{t=0}$  is the peak area of [ACOB<sub>1</sub>] before irradiation at time  $t = 0$ , and  $A_{\text{dodecane}}$  is the peak area of the internal standard, dodecane. Implicit in the use of both eq S1 and eq S2 is the assumption that all of the photoproducts from ACOB<sub>1</sub> are represented by AA, AB<sub>1</sub>, and B<sub>1</sub>B<sub>1</sub>. As mentioned in the main text, this assumption appears to be valid because none of the reasonably expected side products were detected in the GC analyses and the mass balances from the polymers were >90%.

### 1. 3. 2. Error Analyses

Chromatograms from 3-5 injections of each irradiated sample were averaged and the error limits in  $F_c$  values were calculated by standard propagation of error analytical procedures<sup>2</sup> that led to eq S3.

$$\delta F_c = \frac{2}{([AA] + [AB_1] + [B_1B_1])^2} \sqrt{(( [AA] + [B_1B_1] ) \delta [AB_1] )^2 + ([AB_1] \delta [AA])^2 + ([AB_1] \delta [B_1B_1])^2} \quad (S3)$$

$\delta AA$ ,  $\delta AB_1$ , and  $\delta B_1B_1$  are errors in the measurements of products AA,  $AB_1$  and  $B_1B_1$  based on standard deviations of average peak areas.  $\delta AA$  is assumed to be zero in the present study, because the areas of the AB and BB peaks were normalized to the area of the AA peak in each chromatogram.

### 1.4 Relative quantum yield measurements in a photochemical reactor

ACOB<sub>1</sub>, in ethyl acetate (13-18 mM) and in PHDMA and PCHMA (36-40 mol/kg polymer) films, was irradiated at 300 nm through pyrex filters simultaneously at room temperature in a Rayonet merry-go-round (RMA-400) photochemical reactor. Prior to irradiation, the samples were purged with nitrogen gas for 10 min. The windows of the samples were masked with black tape so that the same areas were exposed in each. The initial and final optical densities of the samples at 300 nm were >2 in order to ensure that all of the radiation was absorbed by the ACOB<sub>1</sub>; the AA,  $AB_1$ , and  $B_1B_1$  photoproducts have almost no absorbance at 300 nm. During the 30 min irradiation period, the approximate conversions were assessed by UV-vis absorption measurements. The products and remaining ACOB<sub>1</sub> were extracted exhaustively from the PHDMA and PCHMA films with ethyl acetate. Conversions were calculated from knowledge of the initial concentrations before and after irradiation. The latter was calculated using UV-vis absorption spectra and extinction coefficients of ACOB<sub>1</sub> in ethyl acetate. Thus, 51 % conversion in ethyl acetate and 12 % conversion in PHDMA were found in one run and 33 % conversion in ethyl acetate and 10 % in PCHMA were observed in another.

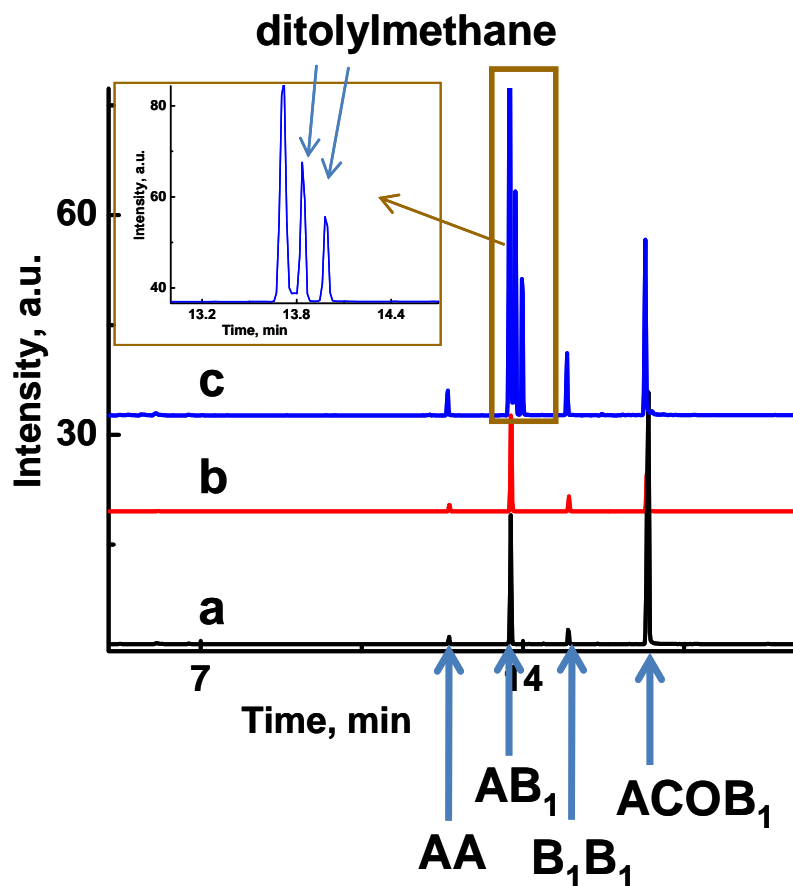

**Figure S1.** GC chromatogram of ACOB<sub>1</sub> and photoproducts extracted from PBMA after irradiations for different intervals of time: (a) 17 % conversion; (b) 62 % conversion; (c) 62 % conversion, co-injected with the isomers of ditolylmethane (the cross-coupled Fischer photoproducts, analogous to AB<sub>1</sub>, and expected from in-cage combination of A·/B<sub>1</sub>· pairs<sup>3</sup>); the more probable cross-coupled Fischer photoproduct expected from combination of pairs of cage-escaped A· radicals, is phenyltolylmethane. The expanded region shows the peaks for AB<sub>1</sub> and the two isomers of the expected Fischer photoproducts.

### 1. 5. Transient absorption studies

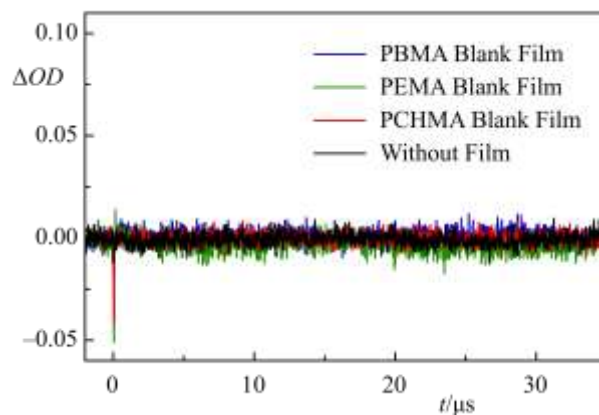

**Figure S2.** Response of the photomultiplier of the laser flash set-up without film and with undoped polymer films, monitored at 320 nm. The emission spike at  $t = 0$  corresponds to scattered 308 nm laser light caused by the blank films.

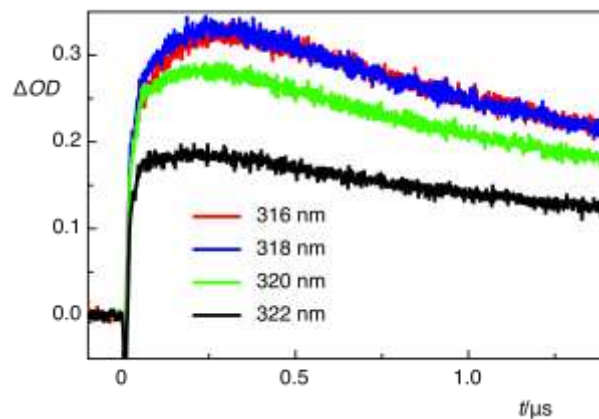

**Figure S3.** Transient absorption rises and decays of benzylic radicals produced upon laser flash photolysis of ACOB<sub>1</sub> in *n*-hexane at 298 K monitored at different wavelengths. Note the time-resolved growth in transient absorption at short times ( $< 500$  ns).

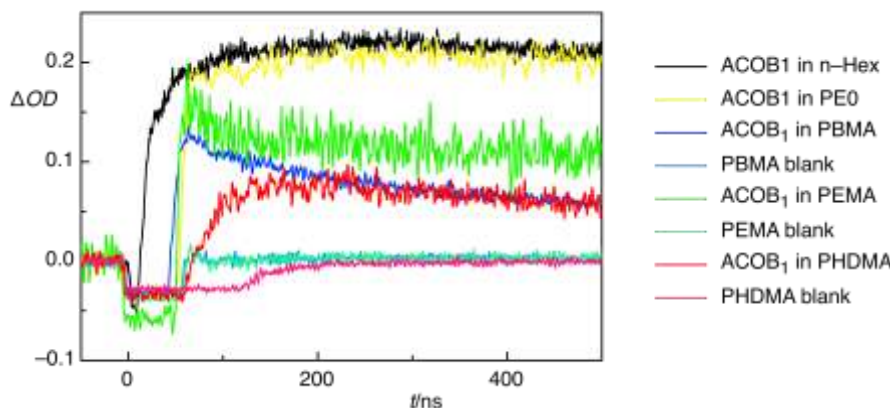

**Figure S4.** Short-time scale transient absorption decays monitored at 320 nm of benzylic radicals produced upon laser flash photolysis of ACOB<sub>1</sub> in different PAMA films at 298 K and in *n*-hexane and a completely amorphous PE film, PE0; also shown for comparison is the response of the apparatus to scattered light from the undoped PAMA films. Segments of the traces with negative  $\Delta OD$  correspond to scattered light, the interference of which is very small for *n*-hexane solution, and very strong for PHDMA films. Note that a time-resolved rise is observed, subsequent to the scattered light response, for ACOB<sub>1</sub> in *n*-hexane solution and PE0 films. This rise is absent for the PBMA and PEMA films, where an immediate decay is observed. For ACOB<sub>1</sub> in PHDMA films, the very strong scattering profile prevents the assignment of a time-resolved rise as being due to a transient absorption phenomenon.

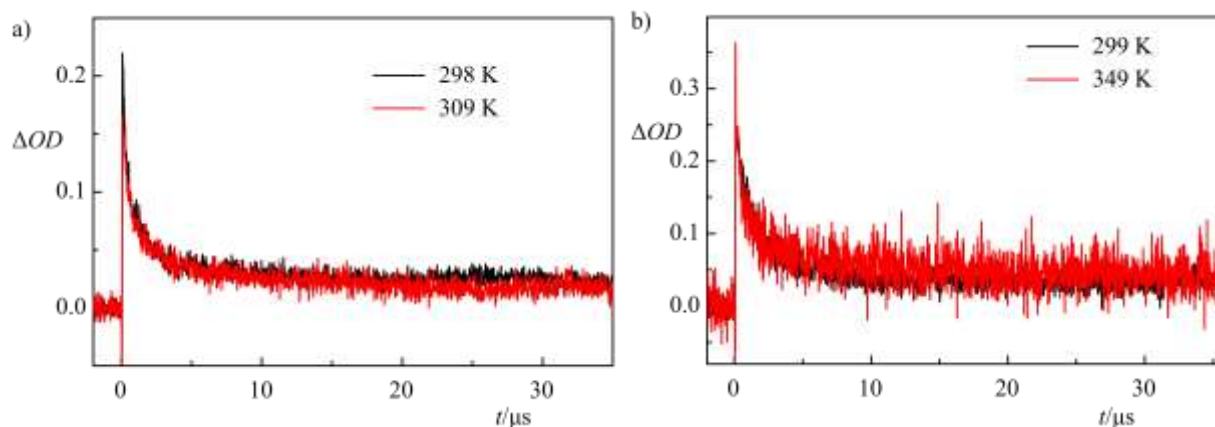

**Figure S5.** Transient absorption decay traces monitored at 320 nm of benzylic radicals produced by laser flash photolysis of ACOB<sub>1</sub> in (a) PBMA and (b) PEMA polymer films at ambient (black) and elevated (red) temperatures.

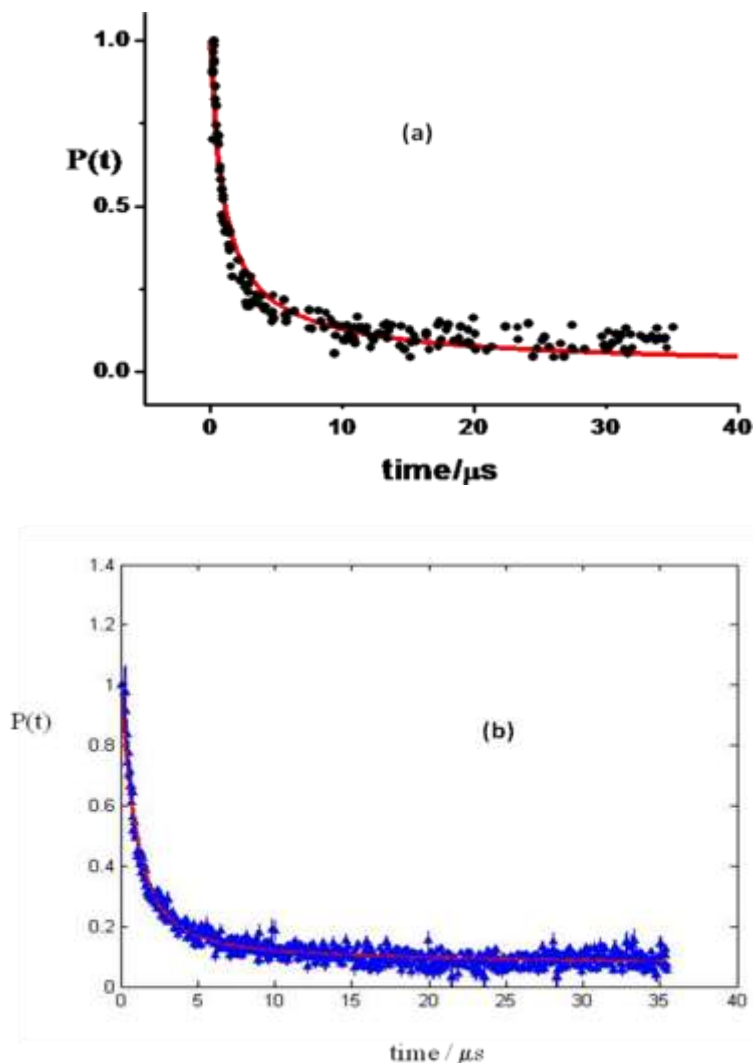

**Figure S6.** (a) Decay of benzylic radicals in PHDMA (●) at 308 K and the fitted trace (red line) according to the Kutsenova model (eq 3) in the main text. Note the deviation of the best fit from the data points at  $t > 20 \mu\text{s}$ ; (b) Decay of benzylic radicals in PHDMA (blue ▲) at 308 K and the fitted trace (red line) according to Khudyakov model (eq 4) in the main text.

## 1. 6. Positronium annihilation lifetime measurements

**Table S1.** Effect of temperature on *o*-positronium (*o*-Ps) intensities and lifetimes in PEMA, as well as calculated free volumes.

| $T$ [K] | <i>o</i> -Ps Intensity [%] | SD <sup>a</sup> [%] | <i>o</i> -Ps Lifetime [ns] | SD <sup>a</sup> [ns] | Radius [Å] | SD <sup>a</sup> [Å] | Volume [Å <sup>3</sup> ] | SD <sup>a</sup> [Å <sup>3</sup> ] |
|---------|----------------------------|---------------------|----------------------------|----------------------|------------|---------------------|--------------------------|-----------------------------------|
| 296     | 25.54                      | 0.43                | 2.161                      | 0.022                | 2.996      | 0.018               | 112.7                    | 2.1                               |

|     |       |      |       |       |       |       |       |     |
|-----|-------|------|-------|-------|-------|-------|-------|-----|
| 306 | 25.59 | 0.27 | 2.204 | 0.010 | 3.033 | 0.009 | 116.9 | 1.0 |
| 311 | 25.99 | 0.22 | 2.206 | 0.015 | 3.035 | 0.013 | 117.1 | 1.5 |
| 316 | 25.80 | 0.43 | 2.230 | 0.022 | 3.056 | 0.018 | 119.5 | 2.2 |
| 321 | 26.14 | 0.24 | 2.242 | 0.013 | 3.066 | 0.011 | 120.7 | 1.3 |
| 326 | 27.29 | 0.18 | 2.237 | 0.010 | 3.061 | 0.009 | 120.1 | 1.0 |
| 331 | 27.67 | 0.18 | 2.252 | 0.006 | 3.074 | 0.005 | 121.6 | 0.6 |
| 336 | 29.29 | 0.13 | 2.228 | 0.006 | 3.054 | 0.005 | 119.3 | 0.6 |
| 341 | 28.96 | 0.41 | 2.301 | 0.027 | 3.115 | 0.022 | 126.6 | 2.7 |
| 346 | 29.92 | 0.39 | 2.306 | 0.027 | 3.119 | 0.022 | 127.1 | 2.7 |
| 351 | 30.50 | 0.16 | 2.339 | 0.013 | 3.146 | 0.010 | 130.4 | 1.3 |
| 356 | 31.52 | 0.10 | 2.349 | 0.001 | 3.154 | 0.001 | 131.4 | 0.2 |
| 361 | 31.69 | 0.48 | 2.416 | 0.018 | 3.207 | 0.014 | 138.2 | 1.8 |
| 366 | 32.14 | 0.32 | 2.455 | 0.008 | 3.238 | 0.006 | 142.2 | 0.8 |

<sup>a</sup> One standard deviation (SD) of a minimum of 3 samples.

**Table S2.** Effect of temperature on *o*-positronium (*o*-Ps) intensities and lifetimes in PBMA, as well as calculated free volumes. Standard deviations (SD) of measurements are also shown.

| <i>T</i> [K] | <i>o</i> -Ps Intensity [%] | SD <sup>a</sup> [%] | <i>o</i> -Ps Lifetime [ns] | SD <sup>a</sup> [ns] | Radius [Å] | SD <sup>a</sup> [Å] | Volume [Å <sup>3</sup> ] | SD <sup>a</sup> [Å <sup>3</sup> ] |
|--------------|----------------------------|---------------------|----------------------------|----------------------|------------|---------------------|--------------------------|-----------------------------------|
| 258          | 27.69                      | 1.64                | 2.199                      | 0.056                | 3.029      | 0.047               | 116.4                    | 5.5                               |
| 263          | 28.03                      | 0.66                | 2.214                      | 0.030                | 3.042      | 0.025               | 117.9                    | 3.0                               |
| 268          | 28.45                      | 0.50                | 2.254                      | 0.028                | 3.075      | 0.023               | 121.8                    | 2.8                               |
| 273          | 28.55                      | 0.71                | 2.279                      | 0.026                | 3.096      | 0.021               | 124.3                    | 2.6                               |
| 278          | 28.25                      | 0.86                | 2.321                      | 0.038                | 3.131      | 0.031               | 128.5                    | 3.9                               |
| 283          | 28.99                      | 0.49                | 2.347                      | 0.017                | 3.152      | 0.014               | 131.2                    | 1.7                               |
| 288          | 29.53                      | 0.31                | 2.385                      | 0.024                | 3.183      | 0.019               | 135.1                    | 2.4                               |



|     |       |      |       |       |       |       |       |     |
|-----|-------|------|-------|-------|-------|-------|-------|-----|
| 293 | 29.37 | 1.39 | 2.415 | 0.051 | 3.207 | 0.040 | 138.1 | 5.3 |
| 298 | 30.19 | 0.32 | 2.452 | 0.023 | 3.236 | 0.018 | 141.9 | 2.4 |
| 298 | 29.95 | 0.45 | 2.454 | 0.027 | 3.237 | 0.021 | 142.1 | 2.8 |
| 303 | 30.04 | 0.37 | 2.483 | 0.022 | 3.260 | 0.017 | 145.1 | 2.2 |
| 308 | 30.34 | 0.28 | 2.524 | 0.014 | 3.291 | 0.011 | 149.3 | 1.5 |
| 313 | 30.36 | 0.34 | 2.561 | 0.023 | 3.320 | 0.017 | 153.3 | 2.4 |
| 318 | 31.02 | 0.31 | 2.574 | 0.029 | 3.330 | 0.022 | 154.7 | 3.0 |

<sup>a</sup> One standard deviation (SD) of a minimum of 3 samples.

**Table S3.** Effect of temperature on *o*-positronium (*o*-Ps) intensities and lifetime in PIBMA, as well as calculated free volumes. Standard deviations (SD) of measurements are also shown.

| <b><i>T</i> [K]</b> | <b><i>o</i>-Ps Intensity [%]</b> | <b>SD<sup>a</sup> [%]</b> | <b><i>o</i>-Ps Lifetime [ns]</b> | <b>SD [ns]</b> | <b>Radius [Å]</b> | <b>SD [Å]</b> | <b>Volume [Å<sup>3</sup>]</b> | <b>SD [Å<sup>3</sup>]</b> |
|---------------------|----------------------------------|---------------------------|----------------------------------|----------------|-------------------|---------------|-------------------------------|---------------------------|
| 296                 | 29.30                            | 0.21                      | 2.548                            | 0.017          | 3.310             | 0.013         | 151.9                         | 1.8                       |
| 301                 | 28.87                            | 0.71                      | 2.628                            | 0.042          | 3.370             | 0.031         | 160.3                         | 4.5                       |
| 306                 | 28.71                            | 0.29                      | 2.703                            | 0.018          | 3.426             | 0.013         | 168.4                         | 1.9                       |
| 311                 | 29.22                            | 0.79                      | 2.730                            | 0.035          | 3.445             | 0.026         | 171.2                         | 3.8                       |
| 316                 | 29.06                            | 0.43                      | 2.781                            | 0.024          | 3.482             | 0.017         | 176.8                         | 2.6                       |
| 321                 | 29.59                            | 0.29                      | 2.811                            | 0.027          | 3.503             | 0.019         | 180.1                         | 2.9                       |
| 326                 | 30.62                            | 0.73                      | 2.896                            | 0.046          | 3.563             | 0.031         | 189.5                         | 5.1                       |
| 331                 | 31.12                            | 0.24                      | 2.923                            | 0.016          | 3.581             | 0.011         | 192.4                         | 1.8                       |
| 336                 | 30.83                            | 0.24                      | 3.002                            | 0.019          | 3.635             | 0.012         | 201.2                         | 2.1                       |
| 341                 | 30.62                            | 0.78                      | 3.027                            | 0.047          | 3.652             | 0.031         | 204.0                         | 5.2                       |
| 346                 | 30.29                            | 0.40                      | 3.036                            | 0.031          | 3.658             | 0.020         | 205.0                         | 3.4                       |
| 351                 | 30.11                            | 0.65                      | 3.055                            | 0.056          | 3.671             | 0.038         | 207.2                         | 6.4                       |
| 356                 | 29.00                            | 0.24                      | 3.105                            | 0.009          | 3.704             | 0.006         | 212.9                         | 1.0                       |

<sup>a</sup> One standard deviation (SD) of a minimum of 3 samples.

**Table S4.** Effect of temperature on *o*-positronium (*o*-Ps) intensities and lifetime in PCHMA, as well as calculated free volumes. Standard deviations (SD) of measurements are also shown.

| <i>T</i> [K] | <i>o</i> -Ps Intensity [%] | SD <sup>a</sup> [%] | <i>o</i> -Ps Lifetime [ns] | SD <sup>a</sup> [ns] | Radius [Å] | SD <sup>a</sup> [Å] | Volume [Å <sup>3</sup> ] | SD <sup>a</sup> [Å <sup>3</sup> ] |
|--------------|----------------------------|---------------------|----------------------------|----------------------|------------|---------------------|--------------------------|-----------------------------------|
| 347          | 23.58                      | 1.03                | 2.232                      | 0.043                | 3.057      | 0.036               | 119.6                    | 4.3                               |
| 352          | 25.04                      | 0.27                | 2.220                      | 0.012                | 3.047      | 0.009               | 118.5                    | 1.1                               |
| 357          | 25.99                      | 0.36                | 2.244                      | 0.023                | 3.067      | 0.019               | 120.9                    | 2.3                               |
| 362          | 26.59                      | 0.48                | 2.262                      | 0.034                | 3.083      | 0.028               | 122.7                    | 3.3                               |
| 367          | 27.32                      | 0.47                | 2.304                      | 0.028                | 3.117      | 0.023               | 126.8                    | 2.9                               |
| 372          | 29.12                      | 0.47                | 2.290                      | 0.028                | 3.105      | 0.023               | 125.4                    | 2.8                               |
| 377          | 28.84                      | 0.66                | 2.343                      | 0.029                | 3.149      | 0.023               | 130.8                    | 2.9                               |
| 382          | 28.79                      | 0.13                | 2.371                      | 0.008                | 3.171      | 0.006               | 133.6                    | 0.8                               |
| 387          | 28.58                      | 0.40                | 2.430                      | 0.024                | 3.218      | 0.019               | 139.6                    | 2.5                               |
| 392          | 29.17                      | 0.52                | 2.473                      | 0.022                | 3.252      | 0.017               | 144.1                    | 2.3                               |
| 397          | 29.38                      | 0.52                | 2.535                      | 0.020                | 3.300      | 0.016               | 150.5                    | 2.1                               |
| 402          | 30.32                      | 0.27                | 2.559                      | 0.017                | 3.318      | 0.013               | 153.1                    | 1.8                               |
| 407          | 31.05                      | 0.47                | 2.588                      | 0.027                | 3.340      | 0.021               | 156.1                    | 2.9                               |

<sup>a</sup> One standard deviation (SD) of a minimum of 3 samples.

**Table S5.** Effect of temperature on *o*-positronium (*o*-Ps) intensities and lifetime in PHDMA, as well as calculated free volume. Standard deviations (SD) of measurements are also shown.

| <i>T</i> [K] | <i>o</i> -Ps Intensity [%] | SD <sup>a</sup> [%] | <i>o</i> -Ps Lifetime [ns] | SD <sup>a</sup> [ns] | Radius [Å] | SD <sup>a</sup> [Å] | Volume [Å <sup>3</sup> ] | SD <sup>a</sup> [Å <sup>3</sup> ] |
|--------------|----------------------------|---------------------|----------------------------|----------------------|------------|---------------------|--------------------------|-----------------------------------|
| 258          | 20.17                      | 0.31                | 2.182                      | 0.035                | 3.014      | 0.030               | 114.7                    | 3.4                               |
| 263          | 20.46                      | 0.29                | 2.230                      | 0.025                | 3.055      | 0.021               | 119.4                    | 2.5                               |

|     |       |      |       |       |       |       |       |     |
|-----|-------|------|-------|-------|-------|-------|-------|-----|
| 268 | 20.34 | 0.21 | 2.286 | 0.016 | 3.102 | 0.013 | 125.0 | 1.6 |
| 273 | 20.76 | 0.05 | 2.327 | 0.011 | 3.136 | 0.009 | 129.1 | 1.1 |
| 278 | 20.64 | 0.21 | 2.414 | 0.010 | 3.205 | 0.008 | 137.9 | 1.0 |
| 283 | 20.85 | 0.27 | 2.481 | 0.028 | 3.258 | 0.022 | 144.9 | 2.9 |
| 288 | 21.21 | 0.49 | 2.549 | 0.034 | 3.311 | 0.026 | 152.0 | 3.6 |
| 290 | 21.92 | 0.27 | 2.633 | 0.027 | 3.374 | 0.019 | 160.8 | 2.8 |
| 292 | 22.51 | 0.23 | 2.673 | 0.023 | 3.403 | 0.017 | 165.1 | 2.5 |
| 293 | 23.37 | 0.12 | 2.747 | 0.020 | 3.457 | 0.015 | 173.1 | 2.2 |
| 295 | 26.15 | 0.13 | 2.821 | 0.018 | 3.510 | 0.013 | 181.2 | 2.0 |
| 296 | 27.48 | 0.27 | 2.836 | 0.022 | 3.520 | 0.015 | 182.8 | 2.4 |
| 297 | 27.88 | 0.21 | 2.839 | 0.023 | 3.523 | 0.016 | 183.2 | 2.5 |
| 298 | 27.88 | 0.25 | 2.854 | 0.017 | 3.534 | 0.012 | 184.8 | 1.9 |
| 303 | 27.59 | 0.17 | 2.879 | 0.014 | 3.551 | 0.010 | 187.5 | 1.6 |
| 308 | 27.97 | 0.48 | 2.891 | 0.040 | 3.559 | 0.027 | 188.8 | 4.4 |
| 313 | 28.24 | 0.22 | 2.904 | 0.023 | 3.568 | 0.016 | 190.3 | 2.6 |
| 318 | 28.17 | 0.33 | 2.906 | 0.023 | 3.570 | 0.016 | 190.5 | 2.5 |

<sup>a</sup> One standard deviation (SD) of a minimum of 3 samples.

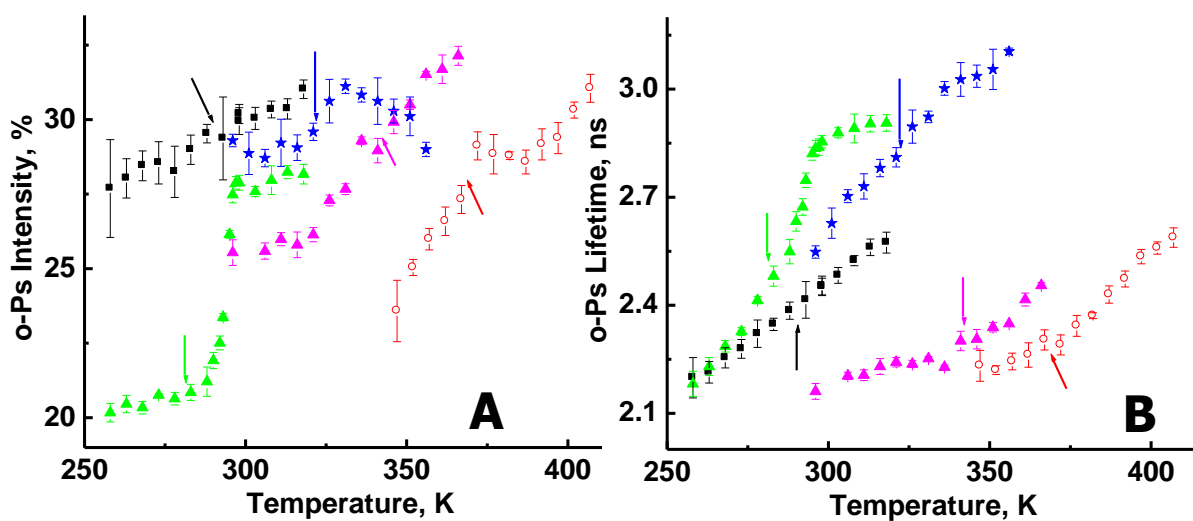

**Figure S7.** Effect of temperature on (A) *o*-Ps intensities and (B) *o*-Ps lifetimes in PAMAs: PCHMA (○), PEMA (△), PIBMA (★), PBMA (■) and B) PHDMA (▲). Arrows refer to melting (for PHDMA) or glass transition temperatures determined from differential scanning calorimetry thermograms.

### 1.7. Dependence of $F_c$ on temperature

**Table S6.** Dependence of product distributions on temperature for irradiations of ACOB<sub>1</sub> in PHDMA films ( $T_m = 281$  K).

| $T$ [K] | percent conversion <sup>a</sup> | [AA]:[AB <sub>1</sub> ]:[B <sub>1</sub> B <sub>1</sub> ] | $F_c$       |
|---------|---------------------------------|----------------------------------------------------------|-------------|
| 258 ± 1 | 21 ± 2                          | 1.0 : 9.0 ± 0.7 : 1.3 ± 0.1                              | 0.59 ± 0.02 |
| 261 ± 2 | 31 ± 2                          | 1.0 : 10.5 ± 0.2 : 1.4 ± 0.1                             | 0.61 ± 0.02 |
| 261 ± 2 | 20 ± 1                          | 1.0 : 7.1 ± 0.3 : 1.4 ± 0.01                             | 0.50 ± 0.02 |
| 261 ± 2 | 19 ± 2                          | 1.0 : 6.2 ± 0.3 : 1.2 ± 0.1                              | 0.47 ± 0.02 |
| 271 ± 1 | 18 ± 1                          | 1.0 : 12.7 ± 0.2 : 1.5 ± 0.1                             | 0.67 ± 0.01 |
| 271 ± 1 | 17 ± 1                          | 1.0 : 10.9 ± 0.4 : 1.5 ± 0.1                             | 0.63 ± 0.02 |
| 274 ± 1 | 20 ± 2                          | 1.0 : 9.1 ± 0.2 : 1.4 ± 0.1                              | 0.58 ± 0.01 |
| 274 ± 1 | 15 ± 1                          | 1.0 : 8.0 ± 0.1 : 1.4 ± 0.03                             | 0.53 ± 0.02 |
| 274 ± 1 | 31 ± 2                          | 1.0 : 7.3 ± 0.6 : 1.3 ± 0.18                             | 0.52 ± 0.04 |
| 296 ± 1 | 39 ± 2                          | 1.0 : 3.2 ± 0.1 : 1.3 ± 0.1                              | 0.16 ± 0.03 |
| 296 ± 1 | 45 ± 1                          | 1.0 : 2.9 ± 0.02 : 1.1 ± 0.03                            | 0.16 ± 0.01 |
| 304 ± 2 | 43 ± 2                          | 1.0 : 3.0 ± 0.2 : 1.2 ± 0.02                             | 0.17 ± 0.03 |
| 304 ± 2 | 42 ± 4                          | 1.0 : 3.1 ± 0.1 : 1.2 ± 0.07                             | 0.16 ± 0.02 |
| 313 ± 1 | 25 ± 2                          | 1.0 : 3.6 ± 0.1 : 1.3 ± 0.1                              | 0.20 ± 0.02 |
| 313 ± 1 | 37 ± 1                          | 1.0 : 3.0 ± 0.1 : 1.3 ± 0.1                              | 0.13 ± 0.03 |

<sup>a</sup> Percent conversions according to eq S1.

**Table S7.** Dependence of product distributions on temperature from irradiations of ACOB<sub>1</sub> in PBMA films ( $T_g = 290$  K).

| $T$ [K] | percent conversion <sup>a</sup> | [AA]:[AB <sub>1</sub> ]:[B <sub>1</sub> B <sub>1</sub> ] | $F_c$        |
|---------|---------------------------------|----------------------------------------------------------|--------------|
| 260 ± 2 | 4 ± 1                           | 1.0 : 10.8 ± 0.2 : 1.3 ± 0.1                             | 0.65 ± 0.01  |
| 274 ± 2 | 4 ± 1                           | 1.0 : 11.7 ± 2.1 : 1.6 ± 0.3                             | 0.63 ± 0.06  |
| 274 ± 2 | 55 ± 2                          | 1.0 : 9.7 ± 0.9 : 1.1 ± 0.2                              | 0.64 ± 0.04  |
| 280 ± 1 | 28 ± 2                          | 1.0 : 18.2 ± 0.9 : 1.6 ± 0.2                             | 0.75 ± 0.02  |
| 301 ± 1 | 18 ± 1                          | 1.0 : 19.3 ± 0.2 : 1.3 ± 0.01                            | 0.79 ± 0.002 |
| 301 ± 1 | 30 ± 1                          | 1.0 : 17.0 ± 1.9 : 1.1 ± 0.1                             | 0.78 ± 0.02  |
| 301 ± 1 | 66 ± 1                          | 1.0 : 16.1 ± 0.8 : 0.97 ± 0.04                           | 0.78 ± 0.01  |
| 301 ± 1 | 83 ± 1                          | 1.0 : 12.1 ± 0.5 : 0.93 ± 0.04                           | 0.73 ± 0.02  |
| 303 ± 1 | 82 ± 1                          | 1 : 21.9 ± 1.7 : 1.5 ± 0.1                               | 0.80 ± 0.01  |
| 303 ± 1 | 57 ± 2                          | 1 : 26.3 ± 1.0 : 1.4 ± 0.1                               | 0.83 ± 0.01  |
| 305 ± 2 | 69 ± 1                          | 1.0 : 18.5 ± 0.6 : 1.1 ± 0.1                             | 0.79 ± 0.01  |
| 309 ± 2 | 62 ± 5                          | 1.0 : 36.6 ± 0.7 : 1.8 ± 0.1                             | 0.86 ± 0.01  |
| 309 ± 2 | 49 ± 2                          | 1.0 : 38.9 ± 0.7 : 1.8 ± 0.1                             | 0.86 ± 0.01  |
| 319 ± 1 | 12 ± 1                          | 1.0 : 58.3 ± 4.3 : 1.4 ± 0.05                            | 0.92 ± 0.01  |

<sup>a</sup> Percent conversions according to eq S1.

**Table S8.** Dependence of product distributions on temperature from irradiations of ACOB<sub>1</sub> in PEMA films ( $T_g = 342$  K).

| $T$ [K] | percent conversion <sup>a</sup> | [AA]:[AB <sub>1</sub> ]:[B <sub>1</sub> B <sub>1</sub> ] <sup>b</sup> | $F_c$        |
|---------|---------------------------------|-----------------------------------------------------------------------|--------------|
| 300 ± 2 | 53 ± 2                          | 1.0 : 26.2 ± 1.8 : 1.6 ± 0.2                                          | 0.81 ± 0.02  |
| 300 ± 1 | 10 ± 1                          | 1.0 : 35.6 ± 2.3 : 1.2 ± 0.2                                          | 0.88 ± 0.01  |
| 300 ± 1 | 7 ± 1                           | 1.0 : 39.97 ± 3.2 : 1.3 ± 0.1                                         | 0.89 ± 0.01  |
| 306 ± 1 | 32 ± 1                          | 1.0 : 42.3 ± 1.8 : 1.3 ± 0.1                                          | 0.90 ± 0.01  |
| 306 ± 1 | 12 ± 1                          | 1.0 : 31.7 ± 2.4 : 1.3 ± 0.1                                          | 0.87 ± 0.01  |
| 310 ± 1 | 14 ± 1                          | 1.0 : 37.3 ± 1.3 : 1.2 ± 0.05                                         | 0.89 ± 0.01  |
| 310 ± 1 | 28 ± 2                          | 1.0 : 83.0 ± 5.1 : 1.2 ± 0.03                                         | 0.95 ± 0.003 |
| 310 ± 1 | 36 ± 2                          | 1.0 : 62.6 ± 9.8 : 1.4 ± 0.1                                          | 0.92 ± 0.01  |
| 320 ± 1 | 18 ± 1                          | 1.0 : 51.5. ± 1.5 : 1.4 ± 0.1                                         | 0.91 ± 0.01  |
| 320 ± 1 | 35 ± 1                          | 1.0 : 89.2. ± 2.0 : 1.66 ± 0.1                                        | 0.94 ± 0.004 |
| 353 ± 1 | 24 ± 3                          | 1.0 : 178.3 ± 3.4 : 1.6 ± 0.1                                         | 0.98 ± 0.001 |
| 360 ± 1 | 23 ± 2                          | [AB <sub>1</sub> ] product                                            | 1.0          |
| 360 ± 1 | 54 ± 3                          | [AB <sub>1</sub> ] product                                            | 1.0          |
| 365 ± 1 | 36 ± 9                          | [AB <sub>1</sub> ] product                                            | 1.0          |
| 374 ± 1 | 26 ± 1                          | [AB <sub>1</sub> ] product                                            | 1.0          |

<sup>a</sup> Percent conversions according to eq S1. <sup>b</sup> [AB<sub>1</sub>] indicates that no peaks for the AA and B<sub>1</sub>B<sub>1</sub> products were detected in the GC chromatograms.

**Table S9.** Dependence of product distributions on temperature from irradiations of ACOB<sub>1</sub> in PCHMA films ( $T_g = 368$  K).

| <b>T [K]</b> | <b>percent conversion<sup>a</sup></b> | <b>[AA]:[AB<sub>1</sub>]:[B<sub>1</sub>B<sub>1</sub>]<sup>b</sup></b> | <b><math>F_c</math></b> |
|--------------|---------------------------------------|-----------------------------------------------------------------------|-------------------------|
| 307 ± 1      | 31 ± 1                                | 1.0 : 389 ± 23 : 1.4 ± 0.1                                            | 0.99 ± 0.001            |
| 307 ± 1      | 32 ± 3                                | 1.0 : 191 ± 30 : 1.4 ± 0.1                                            | 0.99 ± 0.01             |
| 353 ± 1      | 5 ± 0.3                               | 1.0 : 315 ± 17 : 1.6 ± 0.1                                            | 0.98 ± 0.001            |
| 353 ± 1      | 12 ± 0.2                              | 1.0 : 237 ± 6.2 : 1.6 ± 0.1                                           | 0.98 ± 0.001            |
| 379 ± 2      | 5 ± 1                                 | [AB <sub>1</sub> ] product                                            | 1.00                    |
| 379 ± 2      | 72 ± 2                                | [AB <sub>1</sub> ] product                                            | 1.00                    |

<sup>a</sup> Percent conversions according to eq S1. <sup>b</sup> [AB<sub>1</sub>] indicates that no peaks for the AA and B<sub>1</sub>B<sub>1</sub> products were detected in the GC chromatograms.

**Table S10.** Dependence of product distributions on temperature from irradiations of ACOB<sub>1</sub> in PIBMA films ( $T_g = 322$  K)

| <b>T [K]</b> | <b>percent conversion<sup>a</sup></b> | <b>[AA]:[AB<sub>1</sub>]:[B<sub>1</sub>B<sub>1</sub>]<sup>b</sup></b> | <b><math>F_c</math></b> |
|--------------|---------------------------------------|-----------------------------------------------------------------------|-------------------------|
| 294 ± 1      | 9 ± 1                                 | 1.0 : 192 ± 18 : 1.6 ± 0.1                                            | 0.97 ± 0.003            |
| 306 ± 1      | 11 ± 1                                | 1.0 : 115 ± 23 : 1.7 ± 0.1                                            | 0.95 ± 0.01             |
| 306 ± 1      | 9 ± 1                                 | 1.0 : 72 ± 9 : 1.4 ± 0.2                                              | 0.93 ± 0.01             |
| 335 ± 1      | 5 ± 1                                 | [AB <sub>1</sub> ] product                                            | 1.0                     |
| 335 ± 1      | 16 ± 1                                | [AB <sub>1</sub> ] product                                            | 1.0                     |
| 346 ± 1      | 13 ± 1                                | [AB <sub>1</sub> ] product                                            | 1.0                     |
| 355 ± 1      | 19 ± 1                                | [AB <sub>1</sub> ] product                                            | 1.0                     |



|             |            |                            |     |
|-------------|------------|----------------------------|-----|
| $355 \pm 1$ | $21 \pm 1$ | [AB <sub>1</sub> ] product | 1.0 |
|-------------|------------|----------------------------|-----|

<sup>a</sup> Percent conversion according to eq S1. <sup>b</sup> [AB<sub>1</sub>] indicates that no peaks for the AA and B<sub>1</sub>B<sub>1</sub> products were detected in the chromatograms.

## 2. References

- (1) C. A. Chesta, J. Mohanty, W. M. Nau, U. Bhattacharjee, R. G. Weiss, *J. Am. Chem. Soc.* 2007, **129**, 5012.
- (2) J. R. Taylor, *An Introduction to Error Analysis: The Study of Uncertainties in Physical Measurements*; University Science Books: Sausalito, California, 1982.
- (3) H. Langhals, H. Fischer, *Chem. Ber.* 1978, **111**, 543.
